# Supplementary material for: A Phylogenetic Analysis of Greek Isolates ofAspergillusSpecies Based on Morphology and Nuclear and Mitochondrial Gene Sequences
Source: Hindawi journal article supplement (doi:10.1155/2013/260395), 2013-01-01
Supplement: f1 [file 260395.f1.pdf]

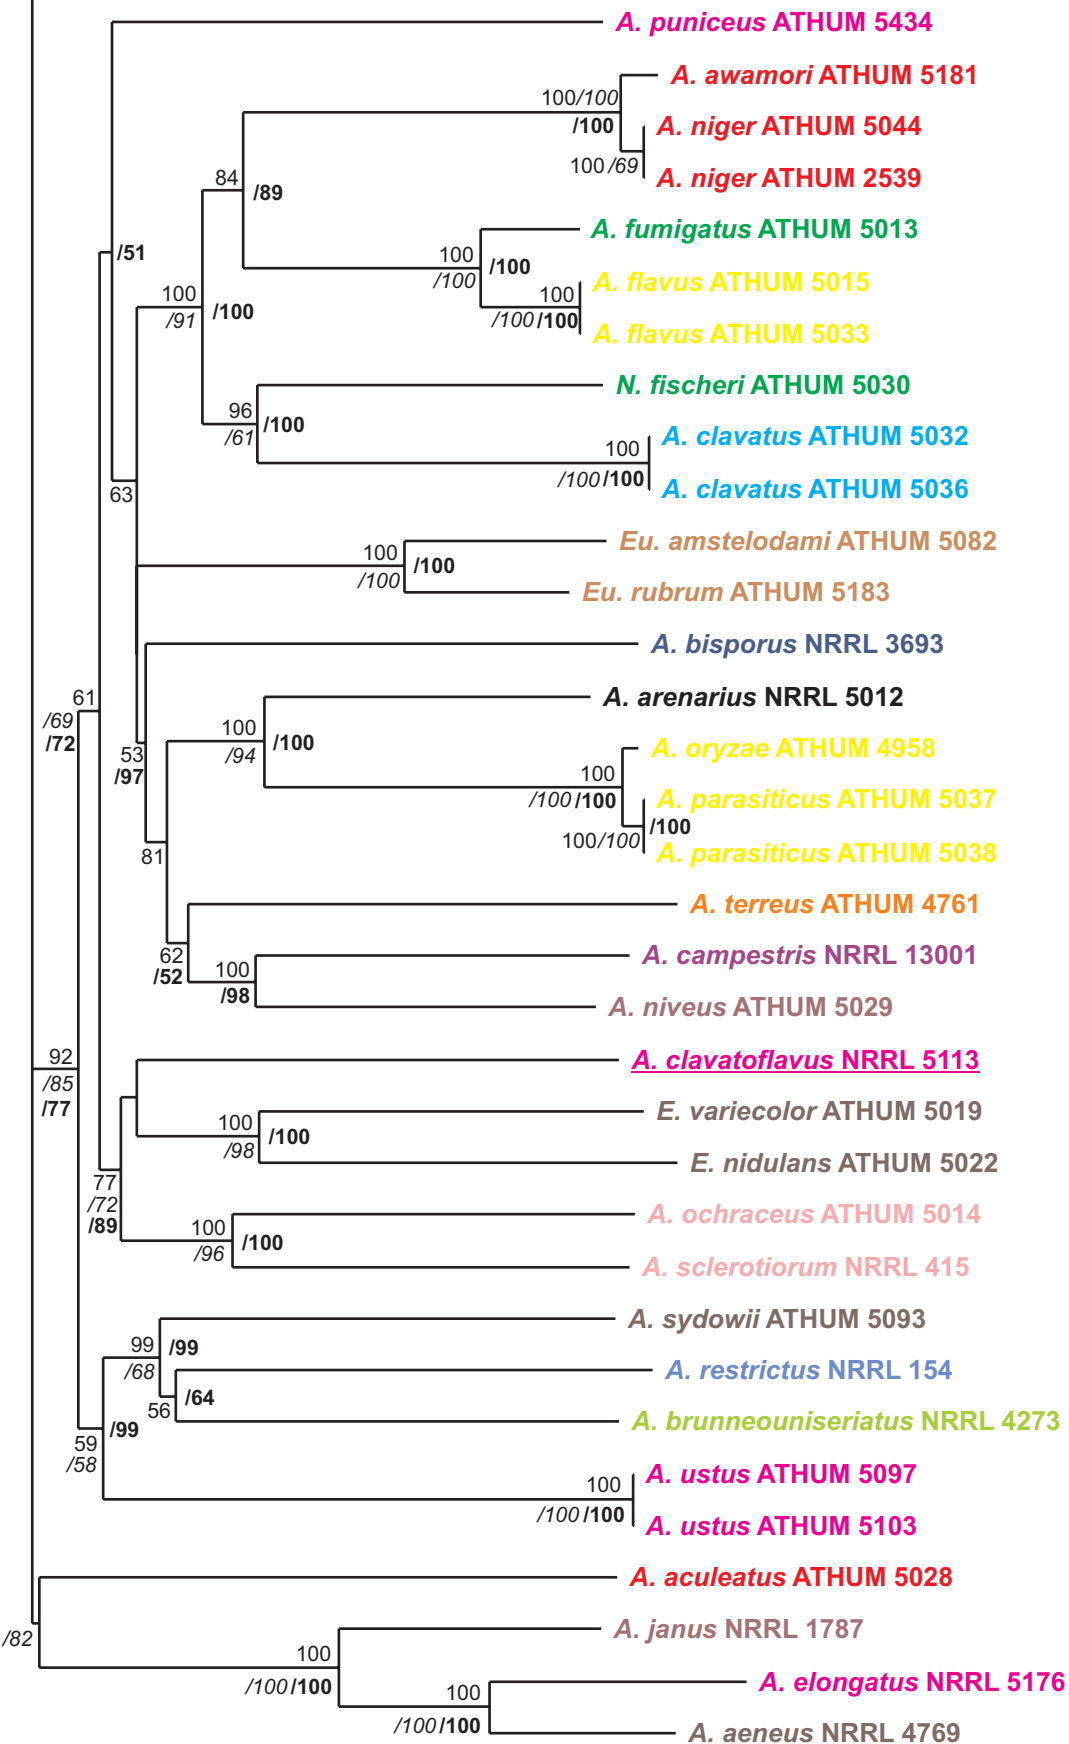

Fig S1
